# Supplementary material
Source: PubMed Central journal article supplement (PMC3123025)

**Figure S1.** (A) Pre-activated cells were stained with anti-CD4, anti-CD8 and anti-mouse-FOXP3 antibodies. Open histograms represent isotype controls; solid histograms represent FOXP3 specific staining. (B) Immunophenotyping of cultured nTreg cells showing absence of CD8+ cells.

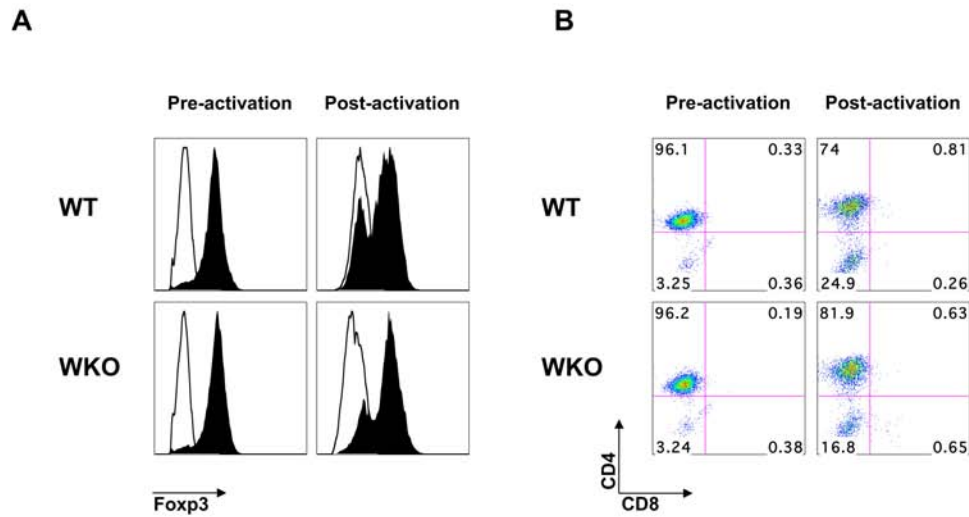

**Figure S2. Pre-activated WKO and WT nTreg cells were stained with specific antibodies for activation markers and nTreg-associated molecules.** Open histograms represent isotype controls (dotted lines) and specific staining before activation (black lines); solid histograms represent specific staining after activation. Representative data from at least three independent experiments are shown.

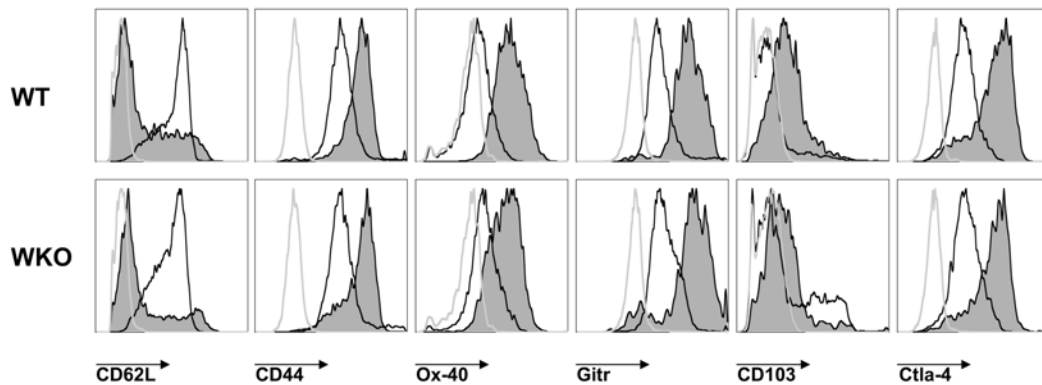

**Figure S3. Representative flow-cytometry plots showing the percentage of apoptotic LPS-activated B220+ B-cells after 8 h coculture with activated nTreg and CD8+ T-cells from WKO or WT mice at a ratio of 1:5**

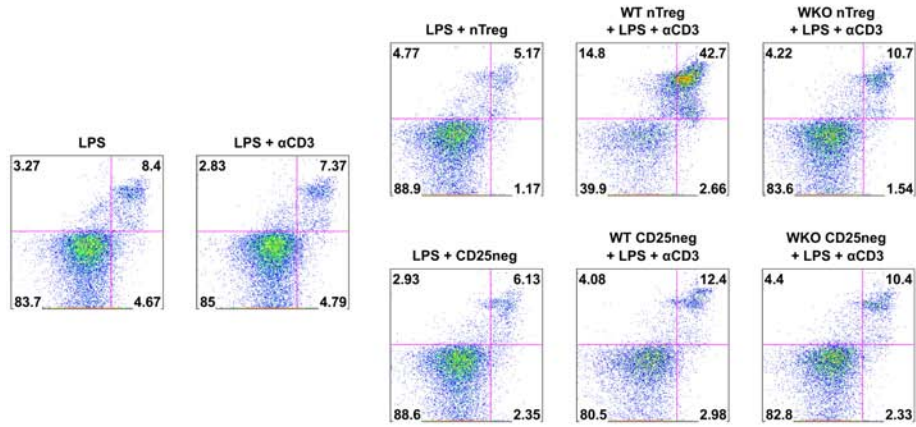

Supplement: supp_blood-2010-12-322834_blood-2010-12-322834-1.pdf [file supp_blood-2010-12-322834_blood-2010-12-322834-1.pdf]
